# Supplementary material for: Reinforcement learning with actor-critic for knowledge graph reasoning
Source: Springer Nature journal article supplement (doi:10.1007/s11432-018-9820-3), 2020-05-09
Supplement: 11432_2018_9820_MOESM1_ESM.pdf [file 11432_2018_9820_MOESM1_ESM.pdf]

# Reinforcement Learning with Actor-critic for Knowledge Graph Reasoning

Linli ZHANG<sup>1,2</sup>, Dewei LI<sup>1,2\*</sup>, Yugeng XI<sup>1,2</sup> & Shuai JIA<sup>1,2</sup>

<sup>1</sup>*Department of Automation, Shanghai Jiao Tong University, Shanghai 200240, China;*

<sup>2</sup>*Key Laboratory of System Control and Information Processing of Ministry of Education, Shanghai 200240, China*

## Appendix A The whole MAP results

In the supplementary file, we give the whole tasks MAP results in Table A1 and detailed experimental result analysis. For the overall MAP shown in the last row of Table A1, our approach significantly outperforms the other three methods [1–3], which validates the strong reasoning ability of our model. For most relations, our method shows high improvement effects. However, there exist some relations that are slightly influenced due to some reason.

Since actor-critic combines policy-based and value-based networks, our model ACRL covers the original network of DeepPath. The reasoning paths found by ACRL contains almost all ones found by DeepPath. What’s more, because of the evaluation of the value-based network and the interaction between ‘actor’ and ‘critic’, ACRL can find more effective reasoning paths and eliminate the wrong paths or path circles, improving the performance of fact prediction. Thus, ACRL outperforms most tasks in fact prediction substantially. However, when the original paths are already correct and complete, ACRL will show little improvement effect. Overall, ACRL shows great improvement effects than other methods.

**Table A1** Fact prediction results(MAP)

| Tasks                           | ACRL          | DeepPath      | TransE | TransD | Improvement |
|---------------------------------|---------------|---------------|--------|--------|-------------|
| personBornInLocation            | <b>0.4878</b> | 0.2895        | 0.2652 | 0.0924 | +68.50%     |
| athletePlaysForTeam             | <b>0.4384</b> | 0.2435        | 0.1400 | 0.1494 | +80.04%     |
| teamPlaysSport                  | <b>0.4120</b> | 0.3084        | 0.3567 | 0.1216 | +33.59%     |
| athleteHomeStadium              | <b>0.7291</b> | <b>0.7291</b> | 0.3810 | 0.0830 | +0.00%      |
| agentBelongsToOrganization      | 0.3287        | <b>0.3308</b> | 0.3498 | 0.1286 | -0.64%      |
| athletePlaysInLeague            | <b>0.5199</b> | 0.5059        | 0.4676 | 0.0762 | +2.77%      |
| personLeadsOrganization         | <b>0.4831</b> | 0.4785        | 0.3494 | 0.2496 | +0.96%      |
| organizationHeadQuarteredInCity | <b>0.6420</b> | 0.5929        | 0.2569 | 0.1520 | +8.28%      |
| organizationHiredPerson         | <b>0.5257</b> | 0.4475        | 0.3073 | 0.3554 | +17.47%     |
| teamPlaysInLeague               | <b>0.7300</b> | 0.6532        | 0.7186 | 0.1421 | +11.76%     |
| worksFor                        | <b>0.4818</b> | 0.4611        | 0.2313 | 0.2494 | +4.49%      |
| athletePlaysSport               | 0.4254        | <b>0.5247</b> | 0.5224 | 0.2651 | -23.34%     |
| Overall                         | <b>0.5170</b> | 0.4638        | 0.3622 | 0.1720 | +11.47%     |

## Appendix B Examples of reasoning paths found by ACRL and DeepPath

Table B1 and Table B2 are some examples of reasoning paths found by ACRL and DeepPath, respectively. These relations of experimental tasks come from NELL-995 [4]. Inverses of existing relations are denoted by ‘.inv’.

Take for example task ‘athletePlaysForTeam’, DeepPath finds one more reasoning path ‘athleteLedSportsTeam → teamPlaysAgainstTeam’ than ACRL, which is a fake one. ACRL evaluates this policy through the critic part, and does not employ this reasoning path. Therefore, ACRL achieves high improvement in the task ‘athletePlaysForTeam’. For the same reason, task ‘organizationHiredPerson’, ‘organizationHeadQuarteredInCity’ and ‘worksfor’ show better results by ACRL.

\* Corresponding author (email: dwli@sjtu.edu.cn)

Besides, ACRL’s critic part can assess actor’s performance in order to prevent the emergence of the reasoning path circles, which reduces the validity of KG reasoning. In the task ‘personBornInLocation’, DeepPath finds some circle reasoning paths like ‘personGraduatedFromUniversity → personGraduatedFromUniversity\_inv → personBornInCity’, ‘personGraduatedFromUniversity → personGraduatedSchool\_inv → personBornInCity’ and ‘personBelongsToOrganization → personBelongsToOrganization\_inv → personBornInCity’. Conversely, ACRL eliminates these circle paths and performs better. Tasks ‘athletePlaysInLeague’ and ‘personLeadsOrganization’ have the same phenomenon.

However, the result of task ‘athletePlaysSport’ shows a special case that there’s some probability the optimal path cannot be reserved until the end in multistep relation reasoning. It is a universality in all methods that multistep process reserves partial relations rather than the whole in each step according to the rules and computing power, which may influence the results.

In addition, ACRL shows little improvement in some tasks like ‘athleteHomeStadium’ and ‘agentBelongsToOrganization’. According to the comparison between ACRL and DeepPath’s reasoning path, it is obvious that they find almost the same reasoning paths ‘athletePlaysForTeam → teamHomeStadium’ and ‘athleteLedSportsTeam → teamHomeStadium’ about relation ‘athleteHomeStadium’. ACRL can hardly improve results under the circumstance that reasoning paths are already correct and complete.

As we can see, since DeepPath fails to use the relation information entirely in the KG, it generally performs worse than our method ACRL. Our method ACRL achieves better MAP with a more compact set of learned paths. However, when there are not enough extra paths between entities, our method and DeepPath can find almost the same reasoning paths, which leads to the little improvement. In conclusion, ACRL experimental results of the fact prediction task on NELL-995 dataset shows larger performance improvement compared with the state-of-the-art methods as a whole.

**Table B1** Example reasoning paths found by ACRL

| Relation                        | Reasoning Path                                                                                                                                                                                                                                                        |
|---------------------------------|-----------------------------------------------------------------------------------------------------------------------------------------------------------------------------------------------------------------------------------------------------------------------|
| personBornInLocation            | personBornInCity                                                                                                                                                                                                                                                      |
| athletePlaysForTeam             | athleteLedSportsTeam<br>athleteHomeStadium → teamHomeStadium_inv                                                                                                                                                                                                      |
| athleteHomeStadium              | athletePlaysForTeam → teamHomeStadium<br>athleteLedSportsTeam → teamHomeStadium                                                                                                                                                                                       |
| agentBelongsToOrganization      | agentCollaboratesWithAgent<br>subpartOf                                                                                                                                                                                                                               |
| athletePlaysInLeague            | athletePlaysForTeam → teamPlaysInLeague<br>athleteLedSportsTeam → teamPlaysInLeague                                                                                                                                                                                   |
| personLeadsOrganization         | personBelongsToOrganization<br>worksFor                                                                                                                                                                                                                               |
| organizationHeadQuarteredInCity | radioStationInCity<br>televisionStationInCity<br>hasOfficeInCity<br>headQuarteredIn                                                                                                                                                                                   |
| organizationHiredPerson         | worksFor_inv<br>organizationTerminatedPerson<br>personBelongsToOrganization_inv<br>coachesTeam_inv                                                                                                                                                                    |
| worksFor                        | organizationHiredPerson_inv<br>personLeadsOrganization<br>agentCollaboratesWithAgent_inv<br>journalistWritesForPublication                                                                                                                                            |
| athletePlaysSport               | athletePlaysForTeam → teamPlaysSport<br>athleleLedSportsTeam → teamPlaysSport<br>athletePlaysInLeague → teamPlaysInLeague_inv → teamPlaysSport<br>athleteFlyOutToSportsTeamPosition → sportHasSportsTeamPosition_inv →<br>sportFansInCountry → sportFansInCountry_inv |

## References

- 1 Xiong W, Hoang T, Wang W Y. DeepPath: A Reinforcement Learning Method for Knowledge Graph Reasoning. In EMNLP, 2017:564-573.
- 2 Bordes A, Usunier N, Garcia-Duran A, et al. Translating Embeddings for Modeling Multi-relational Data. In NIPS, 2013:2787-2795.
- 3 Guoliang J, Shizhu H, Liheng X, et al. Knowledge graph embedding via dynamic mapping matrix. In: ACL, 2015:687-696.
- 4 Andrew C, Justin B, Bryan K, et al. Toward an architecture for neverending language learning. In: AAAI, 2010, 5:3

**Table B2** Example reasoning paths found by DeepPath

| Relation                        | Reasoning Path                                                                                                                                                                                                                                                                                                                                                                                                                                                                                        |
|---------------------------------|-------------------------------------------------------------------------------------------------------------------------------------------------------------------------------------------------------------------------------------------------------------------------------------------------------------------------------------------------------------------------------------------------------------------------------------------------------------------------------------------------------|
| personBornInLocation            | personBornInCity<br>personGraduatedFromUniversity → personGraduatedFromUniversity_inv → personBornInCity<br>personGraduatedFromUniversity → personGraduatedSchool_inv → personBornInCity<br>personBelongsToOrganization → personBelongsToOrganization_inv → personBornInCity                                                                                                                                                                                                                          |
| athletePlaysForTeam             | athleteLedSportsTeam<br>athleteHomeStadium → teamHomeStadium_inv<br>athleteLedSportsTeam → teamPlaysAgainstTeam                                                                                                                                                                                                                                                                                                                                                                                       |
| athleteHomeStadium              | athletePlaysForTeam → teamHomeStadium<br>athleteLedSportsTeam → teamHomeStadium                                                                                                                                                                                                                                                                                                                                                                                                                       |
| agentBelongsToOrganization      | agentCollaboratesWithAgent<br>subpartOf<br>agentControls_inv<br>agentCollaboratesWithAgent_inv                                                                                                                                                                                                                                                                                                                                                                                                        |
| athletePlaysInLeague            | athletePlaysForTeam → teamPlaysInLeague<br>athleteLedSportsTeam → teamPlaysInLeague<br>athleteHomeStadium → leagueStadiums_inv<br>athletePlaysSport → teamPlaysSport_inv → teamPlaysInLeague<br>athletePlaysForTeam → teamPlaysAgainstTeam_inv → teamPlaysInLeague<br>athletePlaysSport → teamPlaysSport_inv → teamPlaysAgainstTeam_inv → teamPlaysInLeague<br>athleteFlyOutToSportsTeamPosition → athleteFlyOutToSportsTeamPosition_inv → athletePlaysSport → teamPlaysSport_inv → teamPlaysInLeague |
| personLeadsOrganization         | personBelongsToOrganization<br>worksFor<br>organizationTerminatedPerson_inv<br>mutualProxyFor_inv<br>organizationHiredPerson_inv<br>agentCollaboratesWithAgent_inv<br>worksFor → worksFor_inv → worksFor                                                                                                                                                                                                                                                                                              |
| organizationHeadQuarteredInCity | radioStationInCity<br>televisionStationInCity<br>hasOfficeInCity<br>headQuarteredIn<br>competesWith_inv → headQuarteredIn                                                                                                                                                                                                                                                                                                                                                                             |
| organizationHiredPerson         | worksFor_inv<br>organizationTerminatedPerson<br>personBelongsToOrganization_inv<br>coachesTeam_inv<br>mutualProxyFor<br>personLeadsOrganization_inv                                                                                                                                                                                                                                                                                                                                                   |
| worksFor                        | organizationHiredPerson_inv<br>personLeadsOrganization<br>agentCollaboratesWithAgent_inv<br>journalistWritesForPublication<br>topmemberOfOrganization                                                                                                                                                                                                                                                                                                                                                 |
| athletePlaysSport               | athletePlaysForTeam → teamPlaysSport<br>athleleledSportsTeam → teamPlaysSport<br>athletePlaysInLeague → teamPlaysInLeague_inv → teamPlaysSport<br>athletePlaysInLeague → leagueStadiums → sportUsesStadium_inv<br>athletePlaysInLeague → subpartOfOrganization_inv → teamPlaysSport                                                                                                                                                                                                                   |
